31 **Abstract**

32 Small isolated populations are vulnerable to both stochastic events and the negative  
33 consequences of genetic drift. For threatened species, the genetic management of such  
34 populations has therefore become a crucial aspect of conservation. Flying foxes (*Pteropus* spp,  
35 Chiroptera) are keystone species with essential roles in pollination and seed dispersal in  
36 tropical and subtropical ecosystems. Yet many flying fox species are also of conservation  
37 concern, having experienced dramatic population declines driven by habitat loss and hunting.  
38 The Ryukyu flying fox (*Pteropus dasymallus*) ranges from Japan and Taiwan to the northern  
39 Philippines, and has undergone precipitous population crashes on several islands in recent  
40 decades. To assess population genetic structure and diversity in *P. dasymallus*, and its likely  
41 causes, we analyzed mitochondrial and microsatellite DNA. Both markers showed significant  
42 genetic differentiation among most island populations with patterns of isolation-by-distance.  
43 However, while mitochondrial haplotypes showed some mixing across the region, likely  
44 reflecting historical colonization and/or dispersal events, microsatellites markers showed clear  
45 subdivisions corresponding to the position of deep ocean trenches. The current distribution of  
46 *P. dasymallus* and its subspecific diversity therefore appears to have arisen through vicariance  
47 coupled with a long history of restricted gene flow across oceanic barriers. We conclude that  
48 isolated island subgroups should be managed separately, with efforts directed at reducing  
49 further declines.

50

51 **Keywords:** genetic differentiation, island biogeography, oceanic dispersal, Pteropodidae,  
52 Ryukyu Islands, vicariance

## 53 Introduction

54 Small and isolated populations are vulnerable to stochastic events and the effects of genetic  
55 drift, potentially leading to the loss of diversity, reduced reproductive fitness, and increased  
56 risks of extinction (Ellstrand & Elam 1993; Frankham 2010; Jordan et al. 2016). The genetic  
57 management of such populations is therefore considered an essential aspect of conservation,  
58 particularly for endangered and threatened species. With detailed genetic information, we can  
59 effectively monitor the loss of genetic diversity and precisely estimate population parameters  
60 such as population size fluctuation, admixture, and gene flow, all of which contribute to our  
61 understanding of long-term species survival (Allendorf et al. 2010; Shafer et al. 2015). Genetic  
62 and nongenetic (e.g., behavioral, ecological, demographic, and environmental) considerations  
63 can therefore be integrated to enhance the efficiency of conservation programmes and further  
64 formulate appropriate management strategies (Hoban et al. 2013; Polechová & Barton 2015;  
65 Frankham et al. 2017).

66 Old World fruit bats (Chiroptera: Pteropodidae) are keystone species that play essential roles  
67 in pollination and seed dispersal in tropical and subtropical ecosystems (Cox et al. 1991; Fujita  
68 & Tuttle 1991). Aside from promoting long-distance seed dispersal needed for forest  
69 restoration (Nyhagen et al. 2005; Shilton & Whittaker 2009), these species also pollinate a  
70 number of economically important plants, including durian (Aziz et al. 2017). Yet despite  
71 acting as major providers of ecosystem services, Old World fruit bats face a range of threats.  
72 Over recent decades, the combined impacts of habitat loss, forest degradation, and hunting for  
73 bushmeat have all led to severe and rapid population declines (Mickleburgh et al. 2002), with  
74 wide-ranging negative ecological and other impacts (Cox & Elmqvist 2000; McConkey &  
75 Drake 2006; Florens et al. 2017). Currently, of the nearly 200 recognised species, over a half  
76 are of conservation concern, including around 30 *Pteropus* species (IUCN 2019).

77 Larger-bodied Old World fruit bats are generally considered to be strong and capable fliers  
78 with extensive home-ranges. For example, genetic analyses of *P. scapulatus* and *Eidolon*  
79 *helvum* have suggested gene flow can occur over thousands of kilometres, across mainland  
80 Australia and Africa, respectively (Sinclair et al. 1996; Peel et al. 2013). Although long distance  
81 movements in large Old World fruit bats might result from natal dispersal events, or from  
82 storms and typhoons, their capacity for long distance day-to-day movements, even among  
83 islands, is likely to be an adaptive trait for tracking ephemeral food resources. For example,  
84 long-distance inter-island movements have been recorded and/or inferred indirectly from  
85 genetic data in several *Pteropus* species, e.g., *P. dasymallus inopinatus*, *P. medius*, *P. niger*, *P.*  
86 *tonganus*, and *P. vampyrus* (McConkey & Drake 2007; Nakamoto et al. 2011a; Larsen et al.  
87 2014; Tsang et al. 2018; Olival et al. 2019). In these taxa, populations on adjacent islands can  
88 appear as single panmictic units. However, in other flying fox species, e.g., *P. livingstonii*, *P.*  
89 *mariannus*, and *P. samoensis*, genetic structure can be present among island groups, indicative  
90 of restricted gene flow (Brown et al. 2011; Russell et al. 2016; Ibouroi et al. 2018). These  
91 contrasting scenarios require different conservation management approaches; in the former  
92 case, island groups might be managed as a single entity, while in the latter case, islands  
93 populations might be better treated as distinct evolutionarily significant units (ESU), and thus  
94 managed separately (Epstein et al. 2009; Oleksy et al. 2019).

95 The Ryukyu flying fox (*Pteropus dasymallus*) is distributed from the Ryukyu Archipelago of  
96 Japan through Taiwan to the northern Philippines (Kinjo & Nakamoto 2009; Figure 1). Five  
97 subspecies are recognized, with populations from Ryukyu Archipelago classified into four  
98 subspecies based on their respective island group ranges (Daito flying fox, *P. d. daitoensis*;  
99 Erabu flying fox, *P. d. dasymallus*; Orii's flying fox, *P. d. inopinatus*; and Yaeyama flying fox,  
100 *P. d. yayeyamae*). The fifth subspecies, from Taiwan, is recognized as the Formosan flying fox

101 (*P. d. formosus*) (Yoshiyuki 1989; Mickleburgh et al. 1992), while a population in the  
102 Philippines has been discovered more recently and has yet to be named formally as a subspecies  
103 (Heaney et al. 1998). This latter population occurs north of Luzon on two oceanic island groups,  
104 the Batanes and Babuyan Islands, and its unclear subspecific status in part reflects the logistical  
105 difficulty in traveling to these islands.

106 *P. dasymallus* is currently categorized as Vulnerable by the IUCN Red List (IUCN 2019),  
107 however, the local conservation status differs among the five subspecies (Vincenot et al. 2017).  
108 In particular, the Daito, Erabu, and Formosan flying foxes are all characterized by small  
109 populations numbering approximately 100-300 individuals (Saitoh et al. 2015). All three are  
110 also protected by national laws, with the Daito and Erabu flying foxes designated as ‘Natural  
111 Monuments’ of Japan, and the former also designated as a ‘National Endangered Species’.  
112 Similarly, the Formosan flying fox is also afforded protection, designated as an ‘Endangered  
113 Species’ in Taiwan. In contrast, the two subspecies Orii’s and Yaeyama flying foxes, and the  
114 Philippine population, appear more common and are not classified as locally threatened  
115 (Heaney et al. 1998; Nakamoto et al. 2011b; Saitoh et al. 2015).

116 The Daito flying fox is geographically restricted to only two small islands of the Daito Islands  
117 (Minamidaito-jima and Kitadaito-jima, Figure 1), where most natural habitat has been  
118 converted into farmland, and where typhoons are the major current threat (Saitoh et al. 2015).  
119 The Erabu flying fox is found on the Ōsumi Islands and Tokara Islands, representing the  
120 northern limit of this species (Yoshiyuki 1989). In Taiwan, the Formosan flying fox was once  
121 abundant in its original main habitat on Lyudao (Green Island) 30.6 km off the southeastern  
122 coast of Taiwan; however, this island population experienced dramatic hunting and habitat loss  
123 in the 1970s and 1980s (Lin & Pei 1999), leading to its near extinction, with only four  
124 individuals have been recorded in recent years (Chen 2009). In 2004, an additional small  
125 population of the Formosan flying fox was recorded for the first time on Gueishan Island  
126 (Turtle Island), 9.7 km off the northeastern coast of Taiwan, and some individuals have  
127 occasionally been found on the main island of Taiwan since 2006 (Wu 2010). At the present  
128 time, nothing is known about the origin of the flying foxes on Gueishan Island and Taiwan’s  
129 main island.

130 To date, the phylogenetic relationships and population divergence among the subspecies of *P.*  
131 *dasymallus* remains obscure but is likely to reflect the geography of the Ryukyu Archipelago.  
132 This island chain comprises around 150 islands, extending for 1200 km between the main  
133 islands of Japan to Taiwan. Although several adjacent Ryukyu islands were connected by a  
134 land bridge in the Last Glacial Maximum (LGM) (Ota 1998), other islands remained isolated  
135 from each other. In fact, genetic studies of several taxonomic groups have revealed divergence  
136 between populations from the Northern, Central, and Southern Ryukyus (Ota 1998, 2000),  
137 areas which remained separated in the LGM by two deep tectonic straits, the Tokara Gap  
138 (Tokara Strait) and the Kerama Gap (Miyako Strait) (Figure 1). The Tokara Gap lies between  
139 Akuseki-jima and Kodakara-jima in the Tokara Islands, while the Kerama Gap, the widest  
140 strait in the Ryukyu Islands, lies between Okinawa-jima and Miyako-jima (Nakamura et al.  
141 2013). Therefore, both of these gaps are likely to have formed geographical barriers, so  
142 promoting genetic drift and divergence among the Northern, Central and/or Southern Ryukyu  
143 populations (Toda et al. 1997; Lin et al. 2002). Of these, Taiwan is geographically closest to  
144 the Southern Ryukyus (110 km), and both species and genetic diversity have been found to be  
145 more similar among Taiwan and the Southern Ryukyus than between these islands and other  
146 regions (>270 km) (Ota 2000; Tominaga et al. 2015). To the south, the two oceanic island  
147 groups of the Batanes and the Babuyan Islands were formed about three million years ago (late  
148 Pliocene), with continued uplift and volcanism into the Pleistocene. The Batanes is closer to  
149 the southern tip of Taiwan (150 km, Bashi Channel) than they are to Luzon (200 km) (Bellwood

150 & Dizon 2013). However, the genetic structure of mammals on the island chain has seldom  
151 been addressed (Yoshikawa et al. 2016).

152 Here we examined genetic diversity and population genetic structure in *P. dasymallus* using  
153 mitochondrial DNA (mtDNA) and microsatellite markers. We aimed to (1) assess the genetic  
154 diversity of *P. dasymallus* across the different island groups, (2) examine whether genetic  
155 differentiation exists among these groups in line with their subspecies designations, (3)  
156 examine the pattern of genetic structure, and (4) examine the relationships between both the  
157 newly-recorded Formosan flying fox individuals (from Gueishan Island and Taiwan's main  
158 island) and the little-studied Philippine samples, and the other subspecies. Our hypotheses were  
159 as follows: First, we hypothesized that the Daito, Erabu, and Formosan flying fox subspecies  
160 will show lower genetic diversity than the other subspecies due to their relatively small  
161 population sizes. Second, we hypothesized that genetic differentiation exists in *P. dasymallus*  
162 and corresponds to the respective subspecies identities. Third, like in many other species in this  
163 region, this differentiation can be also accounted for by regional deep sea trenches: the Tokara  
164 and Kerama Gaps in the Ryukyu Archipelago, and the Bashi Channel between Taiwan and the  
165 northern Philippines. Finally, we hypothesized that the Formosan flying fox individuals, newly  
166 recorded on Gueishan Island and Taiwan's main island, will share a similar genetic structure  
167 with bats from the nearest Yaeyama Islands, suggesting a colonization event. An understanding  
168 of the genetic structure and degree of gene flow among different island groups of *P. dasymallus*,  
169 along with insights into whether these patterns are ancient or new, can help to inform  
170 conservation management decisions, including whether or not to treat small populations  
171 separately, or whether to translocate isolated vagrants.

172

## 173 **Methods**

### 174 **Sampling**

175 We obtained samples of *P. dasymallus* opportunistically over a period of 10 years (2009-2019)  
176 from wild-caught individuals and carcasses found in the wild, as well as rescued and/or captive  
177 individuals. All samples originated from eight different Taiwanese and Ryukyu islands, and  
178 were classified into the five subspecies based on their geographical source following  
179 Mickleburgh et al. (1992). A total of 77 samples were analyzed for this study after removing  
180 duplicate samples and putative parents or offspring of other individuals, as outlined below.  
181 Sample sizes per subspecies were 36 Formosan, 10 Yaeyama, 22 Orii's, 1 Erabu, and 8 Daito.  
182 Formosan flying fox samples were further divided into three groups denoted as TW1 (Gueishan  
183 Island), TW2 (Lyudao), and TW3 (Taiwan's main island) according to the islands from which  
184 they originated. Yaeyama flying fox samples originated from Iriomote-jima and Ishigaki-jima,  
185 Orii's flying fox samples from Okinawa-jima, Erabu flying fox samples from Kuchinoerabu-  
186 jima, and Daito flying fox samples from Minamidaito-jima (Figure 1, Appendix 1).

187 Samples ranged from wing membrane biopsies, blood and frozen muscle tissue to fecal samples.  
188 Wing membrane samples were collected with a 3-mm biopsy punch and placed in 99.5%  
189 ethanol, Allprotect Tissue Reagent (Qiagen), or silica beads until extraction. For the blood  
190 samples, a volume of 0.5 cc was taken by a professional veterinarian and preserved in  
191 ethylenediaminetetraacetic acid (EDTA) anticoagulant. Frozen muscle tissue obtained from  
192 specimens, and fresh feces, were stored in 99.5% ethanol or RNAlater RNA Stabilization  
193 Reagent (Qiagen).

### 194 **DNA extraction and amplification**



195 To extract genomic DNA from wing membrane, blood, and frozen muscle samples, we used  
196 DNeasy Blood and Tissue Kits (Qiagen). For fecal samples, we used the QIAamp Investigator  
197 Kit or QIAamp Fast DNA Stool Mini Kit (Qiagen).

198 We amplified a section of the mtDNA control region using the primers BovL 14987 (5'-CGC-  
199 ATA-TGC-AAT-CCT-ACG-A-3') and BovR 15967 (5'-GCG-GGT-TGC-TGG-TTT-CAC-3'),  
200 which we designed for this study. Polymerase chain reaction (PCR) was carried out in a total  
201 volume of 15  $\mu$ l, containing 20-100 ng of template DNA, 0.25  $\mu$ l of 10  $\mu$ M of each primer, and  
202 7.5  $\mu$ l of Quick Taq HS DyeMix (TOYOBO). Amplification was performed with the following  
203 profile: 2 min at 94°C followed by 30 cycles of 30 s at 94°C, 30s at annealing temperature  
204 (55°C), 50 s at 68°C, and a final extension of 10 min at 68°C. PCR products were run on an  
205 ABI 3730XL DNA Analyzer (Applied Biosystems). The chromatograms were edited and  
206 aligned in the program of SeqMan and MegAlign (DNASTAR). We also obtained three  
207 published *P. dasymallus* partial control region sequences from GenBank and Dryad, for one  
208 Yaeyama flying fox from Irabu-jima (accession NC\_002612.1) (Nikaido et al. 2000), and two  
209 individuals collected from the Batanes Islands, with one from Batan Island and the other from  
210 Sabtang Island (accessions MJV458 and MJV451, respectively), representing the Philippine  
211 population (Tsang et al. 2019).

212 For microsatellite DNA analysis, 108 species-specific markers were generated by Genetic  
213 Identification Services (CA, USA). To quantify polymorphism and characteristics of these loci,  
214 we used a subset of samples. In total, 26 loci were polymorphic and used for subsequent  
215 genotyping 76 samples (Supporting Information S1). For this, PCRs were carried out in a total  
216 volume of 10  $\mu$ l, containing approximately 10-50 ng of template DNA, 0.5  $\mu$ l of 10  $\mu$ M of each  
217 primer, and 5  $\mu$ l of Quick Taq HS DyeMix. Amplification was performed with the following  
218 profile: 2 min at 94°C, followed by 40 cycles of 30 s at 94°C, 30 s at annealing temperature  
219 (54°C), 1 min at 68°C, and a final extension of 10 min at 68°C. PCR products were also run  
220 on an ABI 3730XL DNA Analyzer, and allele scoring was performed using the software  
221 GeneMarker 4.2 (SoftGenetics). Identity and parentage analyses were performed using Cervus  
222 3.0.7 (Kalinowski et al. 2007) to identify duplicate samples and parentage. Samples with  
223 exactly matching genotypes across all loci were determined as duplicates, and removed.  
224 Parentage was determined based on no allele mismatches. Only one sample from each duplicate  
225 or parent-offspring pair was included for further analyses.

## 226 **MtDNA analysis**

227 Based on mtDNA data, we estimated the number of haplotypes, haplotype diversity ( $h$ ),  
228 nucleotide diversity ( $\pi$ ), and average number of pairwise differences for each subspecies. We  
229 determined the extent of genetic differentiation by applying an analysis of molecular variance  
230 (AMOVA) (Excoffier et al. 1992). Only populations with sample sizes greater than one were  
231 included. The total variance was partitioned into variance components attributable to within  
232 and among subspecies. To measure the degree of genetic differentiation among subspecies, the  
233 derived index of the total population was estimated. The significance of the differentiation was  
234 tested by performing 20,000 random permutations. These analyses were performed using  
235 Arlequin 3.5.2.2 (Excoffier & Lischer 2010).

236 We also estimated pairwise differentiation among subspecies, and examined isolation by  
237 distance for genetic distances, estimated by  $\Phi_{ST}$ , among islands. For geographical distances  
238 (km) among pairwise islands, linear Euclidean distances between the centers of pairwise  
239 sampling islands were computed based on latitudinal and longitudinal coordinates. A total of  
240 eleven islands were included in the analysis of isolation by distance (Gueishan Island, Lyudao,  
241 the main island of Taiwan, Iriomote-jima, Ishigaki-jima, Irabu-jima, Okinawa-jima,  
242 Kuchinoerabu-jima, Minamidaito-jima, Batan Island, and Sabtang Island). The significance

243 level was assessed using a Mantel test with 20,000 permutations in Genepop (web version)  
244 (Raymond & Rousset 1995; Rousset 2008).

245 To further visualize genetic structure with respect to subspecies, we generated a haplotype  
246 network. An unrooted maximum likelihood tree was generated in MEGA X (Kumar et al. 2018)  
247 and converted into a haplotype network using Haplotype Viewer (Center for Integrative  
248 Bioinformatics Vienna).

### 249 **Microsatellite DNA analysis**

250 Deviation from Hardy-Weinberg equilibrium (HWE) at each microsatellite locus and  
251 subspecies, and linkage disequilibrium for each pair of loci, were tested using the Markov chain  
252 method (10,000 dememorization steps, 1,000 batches and 10,000 iterations per batch). We  
253 assessed statistical significance using Bonferroni correction for multiple comparisons. For each  
254 microsatellite locus, we recorded the number of alleles ( $N_A$ ), observed heterozygosity ( $H_O$ ),  
255 and expected heterozygosity ( $H_E$ ). For each subspecies, we derived diversity indexes, including  
256 the mean number of alleles ( $N_a$ ), allelic richness corrected for unequal sample size ( $A_C$ ), and  
257 the mean  $H_O$  and  $H_E$ . The average pairwise relatedness (RI) of each subspecies was calculated  
258 to infer relationships between individuals (Ritland 1996).

259 Like mtDNA, we also conducted genetic structure analyses, including AMOVA, pairwise  
260 differentiation, estimated by  $F_{ST}$ , and isolation by distance, for microsatellite data. Eight islands  
261 were included here (Irabu-jima, Batan Island, and Sabtang Island were excluded, where no  
262 microsatellite data was available). These analyses were performed in GenAlEx 6.51 (Peakall  
263 & Smouse 2006, 2012) or Genepop (web version).

264 To examine relationships among populations based on multilocus microsatellite genotype data,  
265 we inferred the number of genetically distinct clusters using the Bayesian clustering approach  
266 implemented in STRUCTURE 2.3.4 (Pritchard et al. 2000; Falush et al. 2003). An admixture  
267 ancestry model with correlated allele frequencies was used with a burnin period of 100,000  
268 iterations followed by 1,000,000 Markov chain Monte Carlo (MCMC) repetitions. The number  
269 of ancestral populations ( $K$ ) was set to 1 to 10. Ten independent runs for each  $K$  to confirm  
270 consistency across runs were performed with prior information on population origins. The best  
271 number of  $K$  was determined based on the mean likelihood ( $L(K)$ ) and variance for each  $K$   
272 value and the *ad hoc* statistic  $\Delta K$  with the Evanno method using the program Structure  
273 Harvester (Evanno et al. 2005; Earl & vonHoldt 2012). The output data were generated and  
274 visualized with Clumpak 1.1 (Kopelman et al. 2015).

275

## 276 **Results**

### 277 **MtDNA analysis**

278 Analyses of partial mtDNA control region sequences revealed 33 haplotypes with 22  
279 parsimony informative sites from a total of 80 *P. dasymallus* samples encompassing the five  
280 recognized subspecies and the Philippines population. Haplotype diversity ( $h$ ), nucleotide  
281 diversity ( $\pi$ ), and pairwise difference averaged over all samples were 0.948, 0.012, and 3.556,  
282 respectively. A summary of the genetic diversity is presented in Table 1. The Philippine  
283 population showed the highest diversity. On the other hand, the Daito flying fox consistently  
284 showed the lowest diversity. We excluded the Erabu flying fox individuals from the  
285 subspecies-level analyses given that only one sample is available.

286 The AMOVA revealed genetic differentiation among the five analyzed populations (the  
287 Formosan, Yaeyama, Orii's, and Daito flying foxes and Philippine population with sample  
288 sizes greater than one). The  $\Phi_{ST}$  value was 0.140, which was significantly different from zero

289 ( $P < 0.001$ , Table 2). This indicated that approximately 14.0% of the total mtDNA genetic  
290 variation was accounted for by the differences among subspecies. The magnitude of the  
291 pairwise differentiation varied markedly with the lowest value shown in the pair of the  
292 Formosan and Yaeyama flying foxes. The Daito flying fox and Philippine population presented  
293 relatively high values of differentiation with other counterparts (Table 3).

294 We found a significant positive correlation between pairwise genetic and geographical  
295 distances based on Mantel tests ( $r^2 = 0.115$ ,  $P < 0.05$ , Figure 2), indicating that genetic  
296 differentiation in *P. dasymallus* across the Ryukyu, Taiwanese and Philippine islands fits an  
297 isolation-by-distance model. Pairwise genetic distances also showed that the TW1 Formosan  
298 flying fox has a close relationship with Yaeyama populations from Iriomote-jima and Ishigaki-  
299 jima (0.082 and 0.016, respectively), with pairwise distances that are lower than those between  
300 TW1 and both the TW2 and TW3 populations from the same subspecies (0.252 and 0.143,  
301 respectively).

302 The haplotype network indicated that one of the Philippine samples (MJV451) from Sabtang  
303 Island showed a relatively deeper genetic divergence with respect to the other samples. On  
304 the other hand, the haplotypes presented by Japanese or Taiwanese samples were genetically  
305 close to each other (Figure 3). Of these, two haplotypes were the most common, shared by  
306 11 and 10 individuals mainly found in Okinawa-jima (Orii's flying fox) and Gueishan Island  
307 (TW1 Formosan flying fox), respectively.

### 308 **Microsatellite analysis**

309 Genotype analysis based on 26 polymorphic microsatellite loci from 76 *P. dasymallus* samples  
310 of five subspecies revealed a moderate degree of polymorphism across subspecies. The number  
311 of alleles at each locus was  $5.27 \pm 2.29$ , ranging from 2 to 10 across all the samples. The mean  
312  $H_O$  and  $H_E$  values were 0.536 and 0.544, respectively. The highest diversity was recorded in  
313 the Formosan or Yaeyama flying fox. In contrast, and in line with the mtDNA data, the Daito  
314 flying fox harboured the lowest diversity (Table 1). The  $F_{IS}$  values were all not significant,  
315 implying no major deviations from HWE. Exact tests showed that four locus-population  
316 combinations deviated from HWE; however, there was no consistent pattern according to either  
317 subspecies or locus. No loci pair was detected in linkage disequilibrium. Finally, average  
318 pairwise relatedness was significant in three analyzed population except the Yaeyama. Daito  
319 flying fox showed a particularly high value of 0.147.

320 The AMOVA based on microsatellite data showed significant genetic differentiation among  
321 subspecies. The  $F_{ST}$  value was 0.069 ( $P < 0.001$ , Table 2). The Formosan and Yaeyama flying  
322 foxes were the only pair without significant differentiation. A pattern of isolation by distance  
323 was also shown here ( $r^2 = 0.298$ ,  $P < 0.01$ , Figure 2).

324 An analysis of genetic structure using STRUCTURE revealed clear substructure among  
325 geographical locations and subspecies identities (Figure 4). The most likely number of genetic  
326 clusters was four ( $K = 4$ ) as inferred using the Evanno method based on the highest  $\Delta K$  and  
327 mean likelihood value without an increase in variance. All or nearly all of the Daito and Orii's  
328 flying fox samples, respectively, were assigned unambiguously to their own clusters, with the  
329 exception of one individual of Orii's flying fox. A number of individuals also showed evidence  
330 of partial inferred ancestry. Formosan flying foxes from TW2 (from Lyudao) and TW3 (from  
331 Taiwan's main island), and Erabu flying foxes, were assigned to a different genetic cluster. On  
332 the other hand, Formosan flying foxes from TW1 (from Gueishan Island) and Yaeyama flying  
333 foxes showed a greater admixture across different genetic clusters with full or partial  
334 membership. For  $K = 3$ , the Erabu and Orii's flying foxes were grouped together. The



335 Formosan and Yaeyama flying foxes showed an admixture of different genetic clusters. For  $K$   
336 = 5, the Erabu flying fox also showed an admixture of membership.

337

## 338 Discussion

339 We examined genetic diversity and structure among the five recognized subspecies of *P.*  
340 *dasymallus* from the Ryukyu Archipelago of Japan to Taiwan, and also included published data  
341 from two individuals sampled from a poorly known population from Batanes, Philippines. Our  
342 analyses based on mtDNA control region sequences and 26 microsatellite markers revealed  
343 significant genetic differentiation among island groups, broadly supporting the subspecies  
344 identities based on geographical locations (Figure 4).

345 Differences in the patterns of differentiation recovered by the two types of markers provide  
346 insights into the history of connectivity of these island populations. Notably, while we detected  
347 no deep divergence among any of the individuals from the five subspecies, the haplotypes  
348 showed evidence of only weak sorting with respect to island (Figure 3). Overall this pattern  
349 points to gene flow in the past, either through recurrent gene flow or colonization and  
350 admixture, alongside evidence of isolation and genetic drift in some cases, likely reflecting  
351 small population sizes. The central position of orange haplotype, which was most abundant in  
352 the Orii's flying fox, suggests that this taxon might have served as a source of other populations  
353 across the Ryukyu and Taiwanese islands. In this scenario, the other subspecies populations  
354 were founded by colonization events, eastward to the Daito Islands and westward to Taiwan.  
355 While we were only able to examine two sequences from the Philippine population, these  
356 showed evidence of high levels of divergence with respect to each other, with the bat sampled  
357 from Sabtang Island also showing clear separation from all other samples. Further study,  
358 including sampling of bats from the Babuyan Islands, is needed to assess the likely causes of  
359 this apparent deep structure.

360 Our microsatellite analyses revealed a cline in genetic diversity from the highest in the  
361 Formosan and Yaeyama flying foxes, to the lowest in the Daito flying fox (Table 1). Of all the  
362 taxa, the Daito flying fox was seen to form a separate cluster with no admixture across different  
363 values of  $K$ . The genetic distinctiveness of the Daito flying fox can be explained by the  
364 comparatively large geographical distance between the remote easternmost Daito Islands and  
365 the other Ryukyu islands (approximately 360 km east off of Okinawa-jima) coupled with the  
366 absence of islands that could serve as stepping-stones for dispersers. The Daito Islands are  
367 uplifted coral islands that lie on the Philippine Sea Plate and are thought to have emerged  
368 approximately 1.2 to 1.6 million years ago in the mid-Pleistocene (Shiroma et al. 2015; Knez  
369 et al. 2017). Consequently, unlike the other continental islands, the oceanic Daito Islands have  
370 never been connected to a land mass by a land bridge during a glacial period. Instead, the  
371 Ryukyu Trench (Figure 1) - a deep, broad water body that separates the Daito Islands from the  
372 Eurasia Plate - has served as a significant geographical barrier to gene flow. We conclude that  
373 the low genetic diversity and high differentiation from other subspecies suggest the Daito  
374 subspecies arose from a historical event involving long-distance oceanic dispersal and has since  
375 experienced geographical and reproductive isolation. Similar differentiation and restricted  
376 gene flow between the Daito Islands and other Ryukyu islands lying on the Eurasia Plate has  
377 been reported for the elegant scops owl (*Otus elegans*) (Hsu 2005).

378 In addition to the Daito flying fox, we also found differentiation among other populations  
379 across the Ryukyu Archipelago based on multilocus genotypes, notably between the Erabu,  
380 Orii's, and the Yaeyama flying foxes. In the case of Erabu, the inclusion of just one sample  
381 strongly limits our interpretations about this population. In contrast, the results for Orii's and

382 Yaeyama were more surprising, especially in light of the mtDNA data. Such subdivisions based  
383 on ncDNA are strongly concordant with the position of deep-sea channels, including the  
384 Tokara and Kerama Gaps, that separate the Northern, Central and Southern Ryukyus. Thus  
385 differentiation among these island groups, appears to have been driven by their long-term  
386 isolation from each other, a consequence of the fact that they were not connected by land-  
387 bridges during the Last Glacial Maximum.

388 In spite of the strong genetic subdivisions detected, our results also showed a significant  
389 positive correlation between genetic and geographical distance that is consistent with a pattern  
390 of isolation by distance across Taiwan and the Ryukyu Islands. Isolation by distance is typically  
391 considered to be a consequence of migration-drift equilibrium, whereby recurrent gene flow  
392 follows a stepping-stone pattern, and is thus more likely to occur among neighboring  
393 populations (Kimura & Weiss 1964). Nevertheless, trends of isolation by distance can also be  
394 generated through a colonization process, in which the contribution of genetic drift outweighs  
395 that of gene flow. Finally, drift and thus isolation by distance might also be more easily detected  
396 at larger spatial scales due to the higher probability that barriers will occur over greater  
397 distances (see Bossart & Prowell 1998). Indeed, in our study system, it is notable that island  
398 groups characterised by stronger genetic differentiation were also more likely to occur on  
399 opposite sides of deep-sea trenches (e.g., Hutchison & Templeton 1999).

400 Previous studies have reported gene flow among flying fox populations over hundreds to  
401 thousands of kilometres, although these have tended to focus on movements over land or along  
402 coast lines. In our study, similar genetic profiles of populations from Taiwan and Yaeyama  
403 support genetic mixing via movements across water, coupled with the formation of a land-  
404 bridge in the LGM. Indeed, these two subspecies are geographically closest and the least  
405 genetically structured. On the other hand, strong differentiation among island populations of  
406 flying foxes separated by 200-300 km, such as between Orii's and Yaeyama, suggests that this  
407 distance represents an upper limit for recurrent gene flow in these bats. Nonetheless, despite  
408 overall clear genetic differentiation based on microsatellites, our structure-based clustering  
409 analyses did reveal a small number of putative migrants. In particular, two individuals recorded  
410 in Taiwan (TW1) and one in Yaeyama, appear to be individuals of the Orii's flying fox.

411 A surprising result of this study was the high recorded genetic diversity in the Formosan flying  
412 fox from Gueishan Island (TW1). The inhabitants living on Gueishan Island before 1977, when  
413 the island was designated as a military control area, claimed that no flying fox had been seen  
414 on the island (Wu 2010), and thus this population is considered to be newly established via  
415 oceanic dispersal. Although this population appears to show a closer relationship with the  
416 Yaeyama flying fox from Iriomote-jima than with the other populations on Taiwan (TW2 and  
417 TW3), its high diversity likely stems from genetic admixture involving several different genetic  
418 clusters (e.g., Comas et al. 2004). Indeed, our results indicate that the TW1 population likely  
419 has multiple ancestral origins with putative founders from Yaeyama, TW2 (from Lyudao),  
420 TW3 (from the main island of Taiwan) and/or the Philippine population.

421 A combination of one or more explanations could account for the genetic diversity found on  
422 Gueishan Island. First, flying foxes might have arrived on Gueishan Island as a result of strong  
423 winds associated with seasonal typhoons or the winter northeast monsoon. Second, individual  
424 bats may have actively dispersed in search of resources. A third scenario is that active dispersal  
425 was driven by population expansion of the Yaeyama flying fox population. Yonaguni-jima of  
426 Japan, the westernmost margin of the distribution of the Yaeyama flying fox (Kinjo &  
427 Nakamoto 2009), is 107 km from Gueishan Island. According to Nakamoto et al. (2011a),  
428 Yaeyama flying foxes have been presumed to be dispersing eastward across the sea to a new  
429 insular habitat approximately 50 km away (from Tarama-jima to Miyako-jima). The flying fox

430 population on Yonaguni-jima or the neighboring islands may also expand westward to  
431 Gueishan Island with the help of winds, forming a widely distributed and diverse population.

432

### 433 **Conclusions**

434 Our findings from mitochondrial and nuclear markers support the current division of  
435 subspecies of *P. dasymallus* from the Ryukyu Archipelago and Taiwan. Genetic subdivisions  
436 among some island groups appear to reflect a lack of long-distance movements across water,  
437 coupled with the presence of deep-sea channels that prevented the formation of land-bridges  
438 during the LGM. We also find evidence that the recent colonization of Taiwan has involved  
439 founders from several distinct clusters. Taken together, we conclude that highly isolated and  
440 genetically distinct populations, such as Daito, should be treated as separate management units.  
441 On the other hand, bats from adjacent islands that show strong evidence of recent and frequent  
442 gene flow can be managed as a single population. The comparatively higher level of divergence  
443 between the Philippine sample from Sabtang Island and all the other sampled bats highlights  
444 the importance of future work to establish the status of this population. More generally, our  
445 results indicate that the evolutionary and ecological forces shaping the pattern of the genetic  
446 structure in *P. dasymallus* are dynamic and ongoing. As a taxon that ranges from the temperate  
447 northern Ryukyu Archipelago and subtropical Taiwan to the tropical northern Philippine  
448 islands, this species may serve as an excellent model for studying the processes driving island  
449 biogeography. Future studies that combine new sequencing technologies with more extensive  
450 sampling of the Philippine populations are expected to improve the current understanding of  
451 the phylogeography of *P. dasymallus* among islands.

452

### 453 **Acknowledgements**

454 We are grateful to the Okinawa Zoo and Museum Foundation, Hiraokawa Zoological Park,  
455 University of Ryukyus, Japan, and Taipei Zoo, Taiwan, for granting access to the collections.  
456 We thank Han-Chun Lee, Hui-Wen Wu, Ching-Lung Lin, Ching-Feng Lin, and many assistants  
457 for their hard work in the field. We also thank Dr. Si-Min Lin for valuable suggestions on the  
458 manuscript and Dr. Tetsuo Denda for laboratory support. This project was funded by the  
459 Forestry Bureau, Council of Agriculture (107-9.1-SB-17(1), 108-9.1-SB-30) and Ministry of  
460 Science and Technology (MOST 107-2621-B-305-001), Taiwan.

461

### 462 **References**

- 463 Allendorf FW, Hohenlohe PA, Luikart G. 2010. Genomics and the future of conservation  
464 genetics. *Nature Reviews Genetics* **11(10)**:697-709.
- 465 Aziz SA, Clements GR, McConkey KR, Sritongchuay T, Pathil S, Abu Yazid MNH,  
466 Campos-Arceiz A, Forget PM, Bumrungsri S. 2017. Pollination by the locally  
467 endangered island flying fox (*Pteropus hypomelanus*) enhances fruit production of the  
468 economically important durian (*Durio zibethinus*). *Ecology and Evolution*  
469 **7(21)**:8670-8684.
- 470 Bellwood P, Dizon E. 2013. The Batanes Islands, Their First Observers, and Previous  
471 Archaeology. Pages 1-8 in Bellwood P, and Dizon E, editors. 4000 Years of  
472 Migration and Cultural Exchange: The Archaeology of the Batanes Islands, Northern  
473 Philippines. ANU Press, Australia.
- 474 Bossart JL, Prowell DP. 1998. Genetic estimates of population structure and gene flow:  
475 limitations, lessons and new directions. *Trends in Ecology & Evolution* **13(5)**:202-  
476 206.

- 477 Brown VA, Brooke A, Fordyce JA, McCracken GF. 2011. Genetic analysis of populations of  
478 the threatened bat *Pteropus mariannus*. *Conservation Genetics* **12(4)**:933-941.
- 479 Chen S-F 2009. Habitat Survey and Natural History of the Formosan Flying Fox. Forestry  
480 Bureau, Council of Agriculture, Taipei.
- 481 Comas D, Plaza S, Wells RS, Yuldaseva N, Lao O, Calafell F, Bertranpetit J. 2004.  
482 Admixture, migrations, and dispersals in Central Asia: evidence from maternal DNA  
483 lineages. *European Journal of Human Genetics* **12(6)**:495-504.
- 484 Cox PA, Elmqvist T. 2000. Pollinator extinction in the Pacific Islands. *Conservation Biology*  
485 **14(5)**:1237-1239.
- 486 Cox PA, Elmqvist T, Pierson ED, Rainey WE. 1991. Flying foxes as strong interactors in  
487 south Pacific island ecosystems: a conservation hypothesis. *Conservation Biology*  
488 **5(4)**:448-454.
- 489 Earl DA, vonHoldt BM. 2012. STRUCTURE HARVESTER: a website and program for  
490 visualizing STRUCTURE output and implementing the Evanno method.  
491 *Conservation Genetics Resources* **4(2)**:359-361.
- 492 Ellstrand NC, Elam DR. 1993. Population genetic consequences of small population size:  
493 implications for plant conservation. *Annual Review of Ecology and Systematics*  
494 **24(1)**:217-242.
- 495 Epstein JH, et al. 2009. *Pteropus vampyrus*, a hunted migratory species with a multinational  
496 home-range and a need for regional management. *Journal of Applied Ecology*  
497 **46(5)**:991-1002.
- 498 Evanno G, Regnaut S, Goudet J. 2005. Detecting the number of clusters of individuals using  
499 the software STRUCTURE: a simulation study. *Molecular Ecology* **14(8)**:2611-2620.
- 500 Excoffier L, Lischer HE. 2010. Arlequin suite ver 3.5: a new series of programs to perform  
501 population genetics analyses under Linux and Windows. *Molecular Ecology*  
502 *Resources* **10(3)**:564-567.
- 503 Excoffier L, Smouse PE, Quattro JM. 1992. Analysis of molecular variance inferred from  
504 metric distances among DNA haplotypes: application to human mitochondrial DNA  
505 restriction data. *Genetics* **131(2)**:479-491.
- 506 Falush D, Stephens M, Pritchard JK. 2003. Inference of population structure using multilocus  
507 genotype data: linked loci and correlated allele frequencies. *Genetics* **164(4)**:1567-  
508 1587.
- 509 Florens F, Baider C, Marday V, Martin G, Zmanay Z, Oleksy R, Krivek G, Vincenot C,  
510 Strasberg D, Kingston T. 2017. Disproportionately large ecological role of a recently  
511 mass-culled flying fox in native forests of an oceanic island. *Journal for nature*  
512 *conservation* **40**:85-93.
- 513 Frankham R. 2010. Challenges and opportunities of genetic approaches to biological  
514 conservation. *Biological Conservation* **143(9)**:1919-1927.
- 515 Frankham R, Ballou JD, Ralls K, Eldridge MDB, Dudash MR, Fenster CB, Lacy RC,  
516 Sunnucks P 2017. Genetic Management of Fragmented Animal and Plant  
517 Populations. Oxford University Press.
- 518 Fujita MS, Tuttle MD. 1991. Flying foxes (Chiroptera: Pteropodidae): Threatened animals of  
519 key ecological and economic importance. *Conservation Biology* **5(4)**:455-463.
- 520 Heaney LR, et al. 1998. A synopsis of the mammalian fauna of the Philippine islands.  
521 *Fieldiana Zoology New Series, No. 88*:1-61.
- 522 Hoban SM, Hauffe HC, Pérez-Espona S, Arntzen JW, Bertorelle G, Bryja J, Frith K,  
523 Gaggiotti OE, Galbusera P, Godoy JA. 2013. Bringing genetic diversity to the  
524 forefront of conservation policy and management. *Conservation Genetics Resources*  
525 **5(2)**:593-598.



- 526 Hsu Y-C. 2005. Molecular Ecology of Elegant Scops Owl (*Otus elegans*). PhD Thesis,  
527 Institute of Ecology and Evolutionary Biology, National Taiwan University, Taipei,  
528 Taiwan.
- 529 Hutchison DW, Templeton AR. 1999. Correlation of pairwise genetic and geographic  
530 distance measures: inferring the relative influences of gene flow and drift on the  
531 distribution of genetic variability. *Evolution* **53(6)**:1898-1914.
- 532 Ibouroi MT, Cheha A, Arnal V, Lagadec E, Tortosa P, Minter GL, Said Ali Ousseni D,  
533 Montgelard C, Besnard A. 2018. The contrasting genetic patterns of two sympatric  
534 flying fox species from the Comoros and the implications for conservation.  
535 *Conservation Genetics* **19(6)**:1425-1437.
- 536 IUCN. 2019. IUCN Red List of Threatened Species, Version 2019-3. <[www.iucnredlist.org](http://www.iucnredlist.org)>.  
537 Downloaded on 28 February 2020.
- 538 Jordan S, Giersch JJ, Muhlfeld CC, Hotaling S, Fanning L, Tappenbeck TH, Luikart G. 2016.  
539 Loss of genetic diversity and increased subdivision in an endemic Alpine stonefly  
540 threatened by climate change. *PLoS ONE* **11(6)**:e0157386.
- 541 Kalinowski ST, Taper ML, Marshall TC. 2007. Revising how the computer program  
542 CERVUS accommodates genotyping error increases success in paternity assignment.  
543 *Molecular Ecology* **16(5)**:1099-1106.
- 544 Kimura M, Weiss GH. 1964. Stepping stone model of population structure and the decrease  
545 of genetic correlation with distance. *Genetics* **49(4)**:561-567.
- 546 Kinjo K, Nakamoto A. 2009. *Pteropus dasymallus*. Pages 52-53 in Ohdachi SD, Ishibashi Y,  
547 Iwasa MA, and Saitoh T, editors. The Wild Mammals of Japan. Shoukadoh Book  
548 Sellers, Kyoto, Japan.
- 549 Knez M, Slabe T, Urushibara-Yoshino K. 2017. Lithology, rock relief and karstification of  
550 Minamidaito Island (Japan). *Acta Carsologica* **46(1)**:47-62.
- 551 Kopelman NM, Mayzel J, Jakobsson M, Rosenberg NA, Mayrose I. 2015. CLUMPAK: a  
552 program for identifying clustering modes and packaging population structure  
553 inferences across *K*. *Molecular Ecology Resources* **15(5)**:1179-1191.
- 554 Kumar S, Stecher G, Li M, Knyaz C, Tamura K. 2018. MEGA X: molecular evolutionary  
555 genetics analysis across computing platforms. *Molecular Biology and Evolution*  
556 **35(6)**:1547-1549.
- 557 Larsen PA, Hayes CE, Wilkins MA, Gomard Y, Sookhareea R, Yoder AD, Goodman SM.  
558 2014. Population genetics of the Mauritian flying fox, *Pteropus niger*. *Acta*  
559 *Chiropterologica* **16(2)**:293-300.
- 560 Lin L-K, Pei K. 1999. On the current status of field population of Formosan fruit bat  
561 (*Pteropus dasymallus formosus*). *Endemic Species Research* **1(1)**:12-19.
- 562 Lin S-M, Chen CA, Lue K-Y. 2002. Molecular phylogeny and biogeography of the grass  
563 lizards genus *Takydromus* (Reptilia: Lacertidae) of East Asia. *Molecular*  
564 *Phylogenetics and Evolution* **22(2)**:276-288.
- 565 McConkey KR, Drake DR. 2006. Flying foxes cease to function as seed dispersers long  
566 before they become rare. *Ecology* **87(2)**:271-276.
- 567 McConkey KR, Drake DR. 2007. Indirect evidence that flying foxes track food resources  
568 among islands in a Pacific Archipelago. *Biotropica* **39(3)**:436-440.
- 569 Mickleburgh SP, Hutson AM, Racey PA, editors. 1992. Old World fruit bats: An action plan  
570 for their conservation. IUCN/SSC Chiroptera Specialist Group, Gland, Switzerland.
- 571 Mickleburgh SP, Hutson AM, Racey PA. 2002. A review of the global conservation status of  
572 bats. *Oryx* **36**:18-34.
- 573 Nakamoto A, Itabe S, Sato A, Kinjo K, Izawa M. 2011a. Geographical distribution pattern  
574 and interisland movements of Orii's flying fox in Okinawa Islands, the Ryukyu  
575 Archipelago, Japan. *Population Ecology* **53(1)**:241-252.



- 576 Nakamoto A, Sato A, Kinjo K, Izawa M. 2011b. Population growth of Orii's flying fox,  
577 *Pteropus dasymallus inopinatus*, on Okinawa-jima Island. Japanese Journal of  
578 Conservation Ecology **16(1)**:45-53.
- 579 Nakamura H, Nishina A, Liu Z, Tanaka F, Wimbush M, Park J-H. 2013. Intermediate and  
580 deep water formation in the Okinawa Trough. Journal of Geophysical Research:  
581 Oceans **118(12)**:6881-6893.
- 582 Nikaido M, Harada M, Cao Y, Hasegawa M, Okada N. 2000. Monophyletic origin of the  
583 order Chiroptera and its phylogenetic position among Mammalia, as inferred from the  
584 complete sequence of the mitochondrial DNA of a Japanese megabat, the Ryukyu  
585 flying fox (*Pteropus dasymallus*). Journal of Molecular Evolution **51(4)**:318-328.
- 586 Nyhagen DF, Turnbull SD, Olesen JM, Jones CG. 2005. An investigation into the role of the  
587 Mauritian flying fox, *Pteropus niger*, in forest regeneration. Biological Conservation  
588 **122(3)**:491-497.
- 589 Oleksy RZ, Ayady CL, Tatayah V, Jones C, Howey PW, Froidevaux JSP, Racey PA, Jones  
590 G. 2019. The movement ecology of the Mauritian flying fox (*Pteropus niger*): a long-  
591 term study using solar-powered GSM/GPS tags. Movement Ecology **7(1)**:12.
- 592 Olival KJ, Latinne A, Islam A, Epstein JH, Hersch R, Engstrand RC, Gurley ES, Amato G,  
593 Luby SP, Daszak P. 2019. Population genetics of fruit bat reservoir informs the  
594 dynamics, distribution and diversity of Nipah virus. Molecular  
595 Ecology:<https://doi.org/10.1111/mec.15288>.
- 596 Ota H. 1998. Geographic patterns of endemism and speciation in amphibians and reptiles of  
597 the Ryukyu Archipelago, Japan, with special reference to their paleogeographical  
598 implications. Researches on Population Ecology **40(2)**:189-204.
- 599 Ota H. 2000. The current geographic faunal pattern of reptiles and amphibians of the Ryukyu  
600 Archipelago and adjacent regions. Tropics **10(1)**:51-62.
- 601 Peakall R, Smouse PE. 2006. GENALEX 6: genetic analysis in Excel. Population genetic  
602 software for teaching and research. Molecular Ecology Notes **6(1)**:288-295.
- 603 Peakall R, Smouse PE. 2012. GenA1Ex 6.5: genetic analysis in Excel. Population genetic  
604 software for teaching and research—an update. Bioinformatics **28(19)**:2537-2539.
- 605 Peel AJ, et al. 2013. Continent-wide panmixia of an African fruit bat facilitates transmission  
606 of potentially zoonotic viruses. Nature Communications **4(1)**:2770.
- 607 Polechová J, Barton NH. 2015. Limits to adaptation along environmental gradients.  
608 Proceedings of the National Academy of Sciences **112(20)**:6401-6406.
- 609 Pritchard JK, Stephens M, Donnelly P. 2000. Inference of population structure using  
610 multilocus genotype data. Genetics **155(2)**:945-959.
- 611 Raymond M, Rousset F. 1995. Genepop (Version-1.2): population genetics software for exact  
612 tests and ecumenicism. Journal of Heredity **86(3)**:248-249.
- 613 Ritland K. 1996. Estimators for pairwise relatedness and individual inbreeding coefficients.  
614 Genetics Research **67(2)**:175-185.
- 615 Rousset F. 2008. GENEPOP'007: a complete re-implementation of the GENEPOP software  
616 for Windows and Linux. Molecular Ecology Resources **8(1)**:103-106.
- 617 Russell AL, Brown VA, Uzzurum RCB, Brooke AP, Wolf LA, Mccracken GF. 2016.  
618 Comparative phylogeography of *Pteropus samoensis* and *P. tonganus* (Pteropodidae:  
619 Chiroptera) in the South Pacific. Acta Chiropterologica **18(2)**:325-335.
- 620 Saitoh T, Kaji K, Izawa M, Yamada F. 2015. Conservation and management of terrestrial  
621 mammals in Japan: its organizational system and practices. Therya **6(1)**:139-153.
- 622 Shafer ABA, et al. 2015. Genomics and the challenging translation into conservation  
623 practice. Trends in Ecology & Evolution **30(2)**:78-87.

- 624 Shilton LA, Whittaker RJ. 2009. The role of pteropodid bats in reestablishing tropical forests  
625 on Krakatau. Pages 176-215 in Fleming TH, and Racey PA, editors. *Island Bats:*  
626 *Evolution, Ecology & Conservation.* University of Chicago, Chicago, USA.
- 627 Shiroma Y, Hosoda M, Ishikawa T, Sahoo SK, Tokonami S, Furukawa M. 2015.  
628 Characteristics of the environmental radon and thoron in Minamidaito-jima, a  
629 comparatively high background radiation island in Japan. *Radiation Emergency*  
630 *Medicine* **4(1)**:27-33.
- 631 Sinclair EA, Webb NJ, Marchant AD, Tidemann CR. 1996. Genetic variation in the little red  
632 flying-fox *Pteropus scapulatus* (Chiroptera: Pteropodidae): implications for  
633 management. *Biological Conservation* **76(1)**:45-50.
- 634 Toda M, Nishida M, Matsui M, Wu G-F, Ota H. 1997. Allozyme variation among East Asian  
635 populations of the Indian rice frog *Rana limnocharis* (Amphibia: Anura). *Biochemical*  
636 *Systematics and Ecology* **25(2)**:143-159.
- 637 Tominaga A, Matsui M, Eto K, Ota H. 2015. Phylogeny and differentiation of wide-ranging  
638 Ryukyu Kajika Frog *Buergeria japonica* (Amphibia: Rhacophoridae): geographic  
639 genetic pattern not simply explained by vicariance through strait formation.  
640 *Zoological Science* **32(3)**:240-248.
- 641 Tsang SM, Wiantoro S, Veluz MJ, Simmons NB, Lohman DJ. 2018. Low levels of  
642 population structure among geographically distant populations of *Pteropus vampyrus*  
643 (Chiroptera: Pteropodidae). *Acta Chiropterologica* **20(1)**:59-71.
- 644 Tsang SM, Wiantoro S, Veluz MJ, Sugita N, Nguyen YL, Simmons NB, Lohman DJ. 2019.  
645 Dispersal out of Wallacea spurs diversification of *Pteropus* flying foxes, the world's  
646 largest bats (Mammalia: Chiroptera). *Journal of Biogeography* **47(2)**:527-537.
- 647 Vincenot CE, Collazo AM, Russo D. 2017. The Ryukyu flying fox (*Pteropus dasymallus*)—  
648 A review of conservation threats and call for reassessment. *Mammalian Biology*  
649 **83(1)**:71-77.
- 650 Wu H-W. 2010. Preliminary Ecological Study on the Formosan Flying Foxes (*Pteropus*  
651 *dasymallus formosus*). MSc Dissertation, Graduate Institute of Forestry and Resource  
652 Conservation, National Taiwan University, Taipei, Taiwan.
- 653 Yoshikawa S, Mimura M, Watanabe S, Lin L-K, Ota H, Mizoguchi Y. 2016. Historical  
654 relationships among wild boar populations of the Ryukyu archipelago and other  
655 Eurasian regions, as inferred from mitochondrial cytochrome *b* gene sequences.  
656 *Zoological Science* **33(5)**:520-527.
- 657 Yoshiyuki M 1989. A Systematic Study of the Japanese Chiroptera. National Science  
658 Museum, Tokyo.
- 659  
660

661 Table 1. Genetic diversity of *Pteropus dasymallus* subspecies estimated with mitochondrial  
 662 DNA control region and 26 microsatellite loci. N: sample size, H: number of haplotype  
 663 observed,  $h$ : haplotype diversity,  $\pi$ : nucleotide diversity,  $k$ : average number of nucleotide  
 664 differences,  $N_a$ : mean number of alleles per locus,  $A_C$ : allelic richness,  $H_O$ : observed  
 665 heterozygosity,  $H_E$ : expected heterozygosity, RI: relatedness,  $F_{IS}$ : inbreeding coefficient. The  
 666 Erabu flying fox was excluded for subspecies-level analyses given that only one sample is  
 667 available. Abbreviation: FF, flying fox.  
 668

| Population  | mtDNA |    |       |       |        | Microsatellite DNA |       |       |       |       |        |          |
|-------------|-------|----|-------|-------|--------|--------------------|-------|-------|-------|-------|--------|----------|
|             | N     | H  | $h$   | $\pi$ | $k$    | N                  | $N_a$ | $A_C$ | $H_O$ | $H_E$ | RI     | $F_{IS}$ |
| Formosan FF | 36    | 16 | 0.889 | 0.012 | 3.557  | 36                 | 4.885 | 3.599 | 0.574 | 0.601 | 0.004* | 0.060    |
| Yaeyama FF  | 11    | 10 | 0.982 | 0.011 | 3.200  | 10                 | 3.731 | 3.480 | 0.596 | 0.584 | 0.005  | 0.031    |
| Orii's FF   | 22    | 9  | 0.844 | 0.008 | 2.377  | 22                 | 3.846 | 3.351 | 0.540 | 0.575 | 0.029* | 0.083    |
| Erabu FF    | 1     | 1  | -     | -     | -      | 1                  | -     | -     | -     | -     | -      | -        |
| Daito FF    | 8     | 3  | 0.679 | 0.007 | 2.214  | 7                  | 2.885 | 2.885 | 0.434 | 0.418 | 0.147* | 0.040    |
| Philippines | 2     | 2  | 1.000 | 0.043 | 13.000 | -                  | -     | -     | -     | -     | -      | -        |

669  
 670  
 671

672 Table 2. Analysis of molecular variance (AMOVA) for *Pteropus dasymallus*. Five populations,  
673 including the Formosan, Yaeyama, Orii's, and Daito flying foxes and Philippine population,  
674 with sample sizes greater than one are included in the mtDNA analysis. The first four are  
675 included in the microsatellite analysis.  
676

| Source of         | mtDNA     |          | Microsatellite DNA |          |
|-------------------|-----------|----------|--------------------|----------|
|                   | variation | P value  | variation (%)      | P value  |
| Among             | 13.97     | < 0.001* | 6.91               | < 0.001* |
| Within subspecies | 86.03     |          | 93.09              |          |

677 \*: statistically significant  
678  
679

680 Table 3. Pairwise genetic differentiation between *Pteropus dasymallus* subspecies or  
681 population.  $\Phi_{ST}$ , above diagonal based on mtDNA data;  $F_{ST}$ , below diagonal based on  
682 microsatellite data. The Erabu flying fox is excluded. Statistical significance is also provided.  
683 Abbreviation: FF, flying fox.

684

| Population  | Formosan<br>FF      | Yaeyama FF          | Orii's FF | Daito FF | Philippines |
|-------------|---------------------|---------------------|-----------|----------|-------------|
| Formosan FF |                     | 0.000 <sup>NS</sup> | 0.096*    | 0.166*   | 0.407*      |
| Yaeyama FF  | 0.011 <sup>NS</sup> |                     | 0.079*    | 0.158*   | 0.361*      |
| Orii's FF   | 0.057*              | 0.036*              |           | 0.247*   | 0.519*      |
| Daito FF    | 0.132*              | 0.139*              | 0.159*    |          | 0.439*      |

685 <sup>NS</sup>: nonsignificant

686 \*: significant at  $P < 0.05$

687

688

689



690 Figures  
691

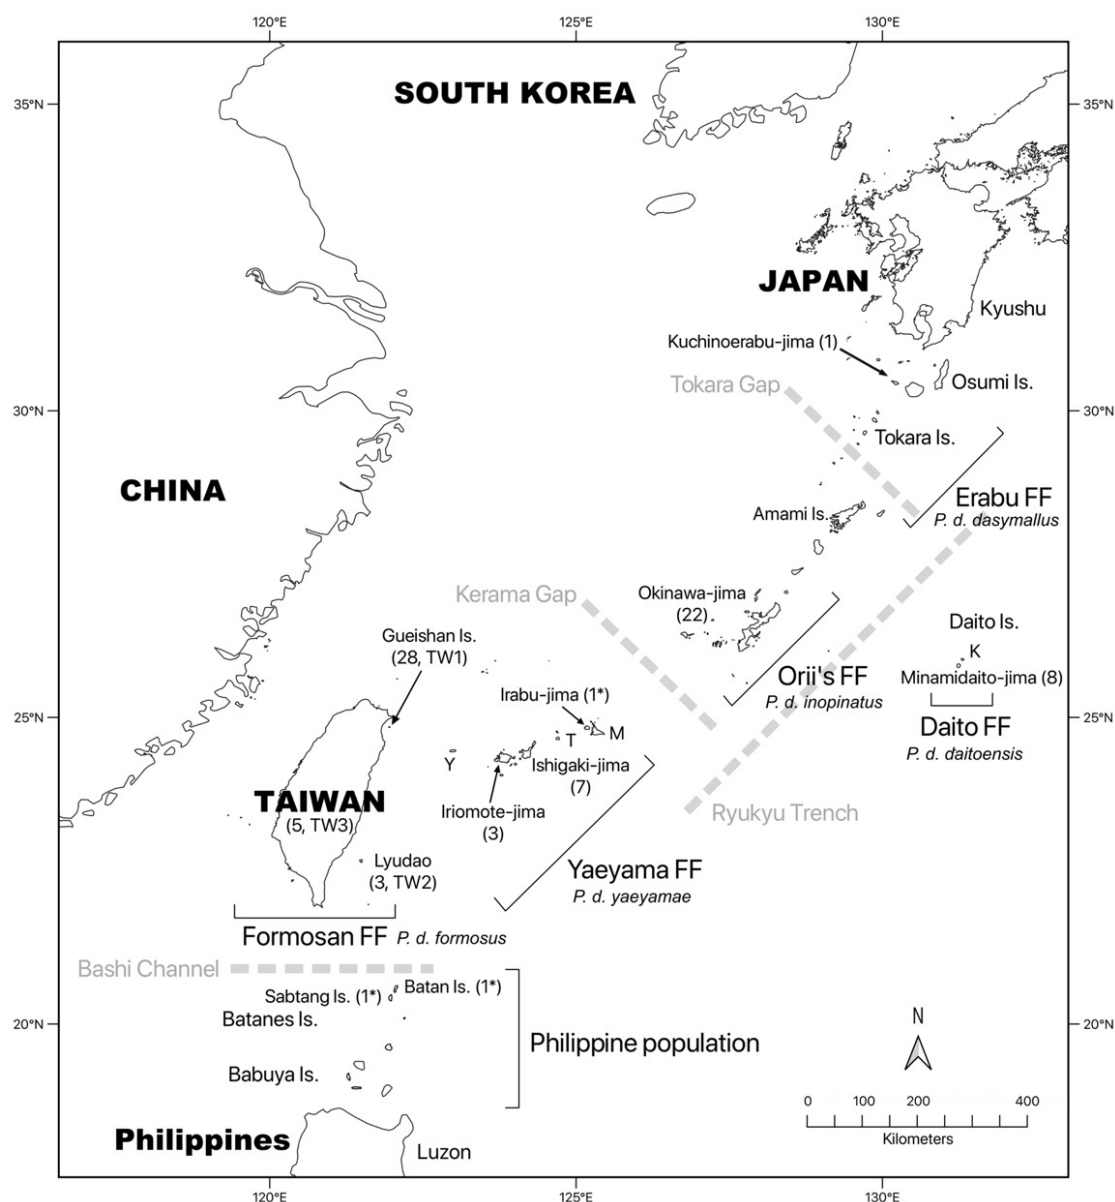

692  
693  
694  
695  
696  
697  
698  
699  
700

Figure 1. Map of the Ryukyu Archipelago, Taiwan, and northern islands of the Philippines showing the distribution of *Pteropus dasymallus*. The locations where the samples used in this study originated is also shown with corresponding sample size presented in brackets. An asterisk indicates DNA sequences acquired from Genbank or Dryad. Abbreviation: FF, flying fox; Y, Yonaguni-jima; T, Tarama-jima; M, Miyako-jima; K, Kitadaito-jima.

701  
702

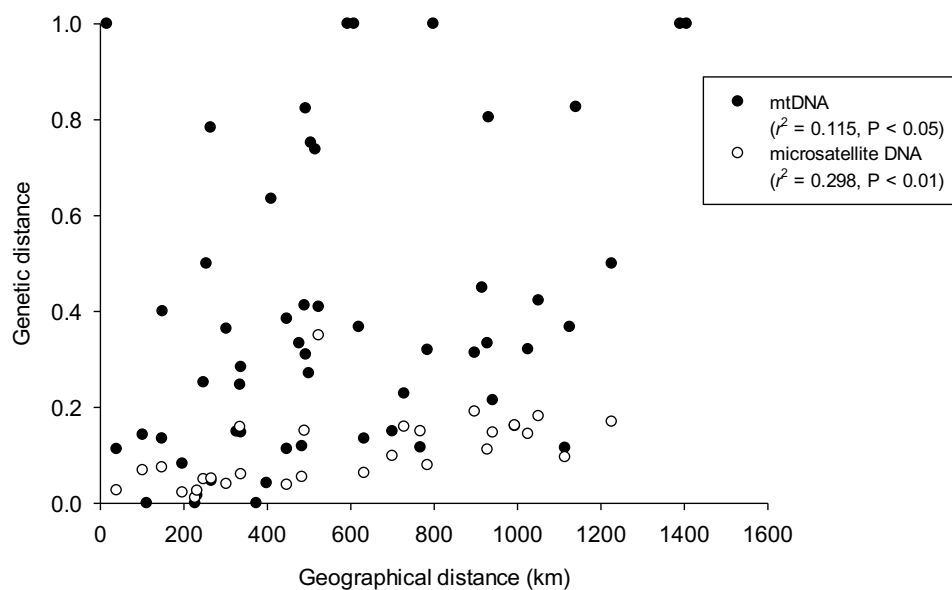

120

721  
722  
723  
724

Figure 2. Relationships between genetic and geographical distances in *Pteropus dasymallus* in pairwise comparisons among islands.

725

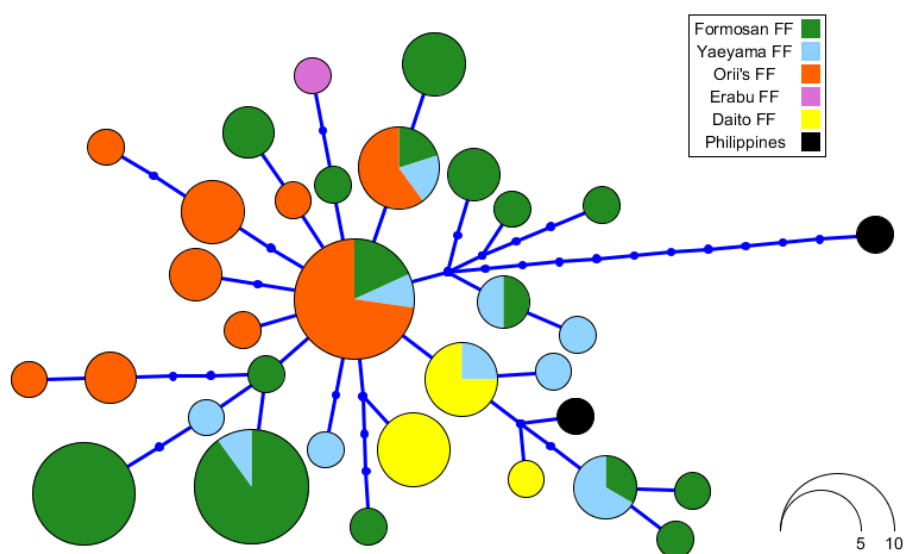

726

727 Figure 3. Haplotype network for *Pteropus dasymallus*. Each color represents a subspecies or  
728 population. The size of each circle is proportional to haplotype frequency. Each line segment  
729 and small dot represent a single mutational step and an inferred intermediate haplotype,  
730 respectively.

731

732

733  
734

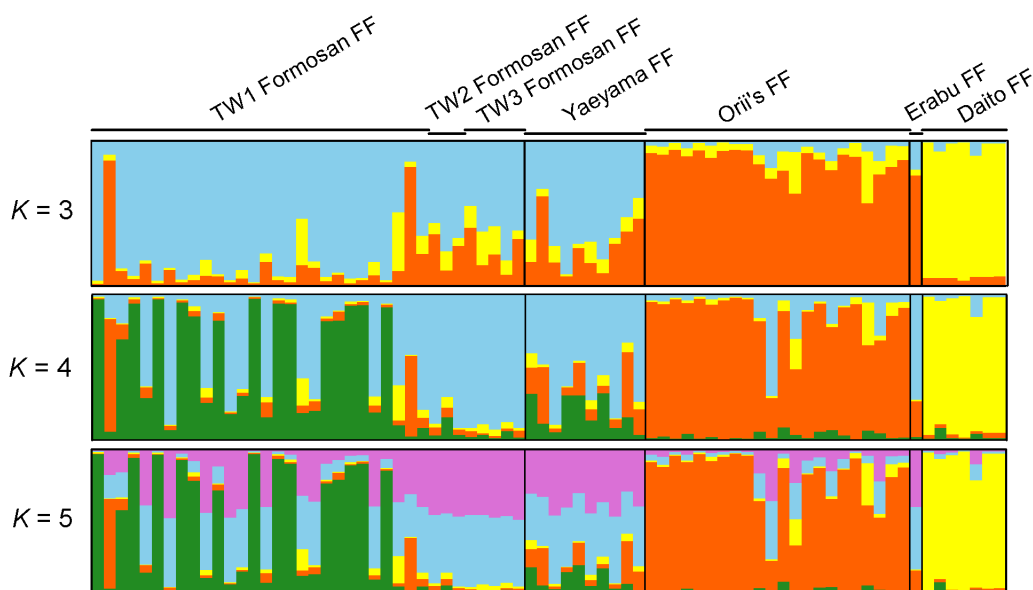

735  
736  
737  
738  
739  
740  
741  
742  
743  
744  
745  
746  
747

Figure 4. Genetic structure of 76 *Pteropus dasymallus* individuals from five subspecies based on a Bayesian STRUCTURE analysis. Each vertical bar represents one individual. Each color represents a genetic cluster. The length of each color in a certain vertical bar is proportional to the probability of assigning the individual to the corresponding cluster. The value of  $K$  indicates the possible number of clusters. The most likely number of clusters with the highest value of  $\Delta K$  is four. The vertical black lines separate subspecies in different island groups. The Y-axis represents proportion, with a range between 0 and 1. Abbreviation: FF, flying fox.

748 Appendix 1. Sample size and localities of origins of *Pteropus*  
 749 *dasy mallus* used in this study.  
 750

| Population name                                | # of samples   | Localities of origins |
|------------------------------------------------|----------------|-----------------------|
| <i>P. d. formosus</i><br>(Formosan flying fox) |                |                       |
| TW1                                            | 28             | Gueishan Island       |
| TW2                                            | 3              | Lyudao                |
| TW3                                            | 5              | Taiwan's main island  |
| <i>P. d. yayeyamae</i><br>(Yaeyama flying fox) |                |                       |
|                                                | 3              | Iriomote-jima         |
|                                                | 7              | Ishigaki-jima         |
|                                                | 1 <sup>a</sup> | Irabu-jima            |
| <i>P. d. inopinatus</i><br>(Orii's flying fox) |                |                       |
|                                                | 22             | Okinawa-jima          |
| <i>P. d. dasymallus</i><br>(Erabu flying fox)  |                |                       |
|                                                | 1              | Kuchnoerabu-jima      |
| <i>P. d. daitoensis</i><br>(Daito flying fox)  |                |                       |
|                                                | 7              | Minamidaito-jima      |
| Philippine population                          |                |                       |
|                                                | 1 <sup>b</sup> | Batan Island          |
|                                                | 1 <sup>b</sup> | Sabtang Island        |
| Total                                          | 80             |                       |

751 <sup>a</sup>: sequence acquired from Genbank with an accession numbers of  
 752 NC\_002612.1 (Nikaido et al. 2000)

753 <sup>b</sup>: sequences acquired from Dryad with catalog numbers of MJV451 and  
 754 MJV458 (Tsang et al. 2019)

755  
 756



757 Supporting Information

758

759 S1. Twenty-six polymorphic microsatellite loci for *Pteropus dasymallus* used in this study.

760

$N_A$ : number of alleles;  $H_O$ : observed heterozygosity;  $H_E$ : expected heterozygosity.

761

| Locus | Forward primer (5'-3')                                                   | Repeat motif  | Size range (bp) | $N_A$ | $H_O$ | $H_E$ |
|-------|--------------------------------------------------------------------------|---------------|-----------------|-------|-------|-------|
| A011  | F: TCTGACTTGAGCCCTAAATGCA<br>R: CCAACTGATATCTCTCTGGGTGGT                 | ATCT          | 177-213         | 10    | 0.774 | 0.668 |
| A013  | F: CATCTTAGCCAAACGCCAGC<br>R: CCTTCCCTTCTATTTTCCTGGA                     | ATCT          | 209-230         | 6     | 0.245 | 0.531 |
| A206  | F: CTAGTGTTAGAAATCTGGGCTATTAATGTATAC<br>R: AAGAGATAATTGAAAGCAAAGAAAAAAGA | ATAG          | 231-247         | 5     | 0.590 | 0.558 |
| A207  | F: GCCATCGGAAATCTAATGTGC<br>R: ACTGTCAAAACACTCTCCAATAAACAA               | ATCT          | 203-215         | 4     | 0.490 | 0.489 |
| A214  | F: GGAAAGAGGTCCCAATGGCT<br>R: TTTTGAATTCTGCATGAGAGATTTG                  | AGAT          | 182-202         | 6     | 0.539 | 0.531 |
| A226  | F: CTTTCCAAATGCCAACTGTTGA<br>R: TCTAGAATGTGAAACATAAGCCTCTGA              | AGAT          | 168-185         | 5     | 0.556 | 0.487 |
| B004  | F: CCGACACATGCCACTTGAGT<br>R: CCCCATGTAATATGCTGCTTTTT                    | GTTT          | 115-123         | 3     | 0.322 | 0.284 |
| B007  | F: TCCGTTTTTTCGCTCAGACA<br>R: GCCCTCGCTGTTCTGATATGA                      | GTTT          | 153-157         | 2     | 0.338 | 0.313 |
| C017  | F: TTTGTGGGTTTCCAGCTTCC<br>R: GGCTTATCCAGAGCAACAGGTC                     | TATG          | 179-196         | 5     | 0.475 | 0.417 |
| C305  | F: TGGATTTTGTAAACCAATGTCACC<br>R: GCCGTTTCCAATTTACTTCTCTCA               | CATA          | 143-156         | 4     | 0.250 | 0.471 |
| C312  | F: AGAGTGCAAGACAGGCAGGG<br>R: TGAACACAAAATGCAGTATATGGATG                 | ATGT          | 209-235         | 6     | 0.370 | 0.361 |
| A313  | F: CTTTGGGATTTACGGGCTA<br>R: AAAAGGTTGGCCATCCTGTG                        | AGAT          | 153-173         | 6     | 0.811 | 0.661 |
| A213  | F: GAACTGGGTCATTGGCTGGTA<br>R: GTGGCTCCTGGGCTACATGT                      | ATCT          | 164-185         | 6     | 0.543 | 0.585 |
| D018  | F: CTCCTCAGTTTAGGCTGTGCA<br>R: TTTTGCCAGTGAGATGCCAA                      | AC            | 154-166         | 7     | 0.378 | 0.400 |
| B215  | F: CTTTTGTGTGACGGCTGGTG<br>R: ACTCAGCCCTCTGCTGTTTCT                      | GT/GTCT       | 174-182         | 5     | 0.559 | 0.503 |
| B014  | F: GCCTCAGTTTCTCCTCTGTGA<br>R: CCTCCACTTCGGTTTACCAAGA                    | AAAC          | 173-181         | 3     | 0.261 | 0.248 |
| A224  | F: CATGGCTCGTGCCTGTTG<br>R: CCTCCCTCTTACTCTCTCTCCA                       | AGAT          | 177-197         | 6     | 0.624 | 0.595 |
| C002  | F: AGGGCAGTATGTCTCCTGAAGC<br>R: TTTAATGCAATCCCTAATTGTTTTTTTT             | ATGT          | 188-196         | 3     | 0.636 | 0.452 |
| A019  | F: ACATGGAAACGGAGGTTGGA<br>R: CACACGGTCACAGAAGGCTG                       | GAT           | 211-214         | 2     | 0.263 | 0.323 |
| A023  | F: TCTTGAAAAATAGCTTGTGGAGA<br>R: CCTGTACACGGGAACCTAAA                    | ATAG          | 178-227         | 6     | 0.505 | 0.533 |
| A014  | F: TGGCAGCATTATTCACAATAGCA<br>R: GCACGTGTAATAATTCCTTTCTCTT               | ATAG          | 212-236         | 7     | 0.675 | 0.645 |
| A317  | F: CCTCACAATCACAGGAGCCA<br>R: GGGCTAGCAGAGAAAAGGGAAC                     | CAGA/<br>AGAT | 215-251         | 10    | 0.779 | 0.715 |
| C220  | F: CCACTTACTTCCAATTCTTACCAGC<br>R: TGAGTATTTTACCAGTGTGTTTCG              | CATA          | 221-236         | 4     | 0.325 | 0.338 |
| A015  | F: TTTGGAAAAACGACCCCTT<br>R: GCATCAAAGCATTAGGGAGGAA                      | AAC           | 265-286         | 4     | 0.233 | 0.236 |
| A001  | F: TCTCGGTCTGTTCCCTGAGG<br>R: TGACTATTTAAGTCATTTGCCCATTT                 | AAC           | 299-302         | 2     | 0.406 | 0.352 |
| A222  | F: GGGTTGAGAGGAGGCAGTTCT<br>R: CCAAATAGCTTTAGGAAGGTCCCT                  | ATCT          | 338-386         | 11    | 0.801 | 0.656 |

762

763

764
